# Supplementary material for: Randomised study of a new inline respiratory function monitor (Juno) to improve mask seal and delivered ventilation with neonatal manikins
Source: bioRxiv or medRxiv preprint supplement (doi:10.1101/2023.09.12.23295396), 2023-09-14

Supplementary Figures

Figure 3S: Current commercial Juno monitor display.

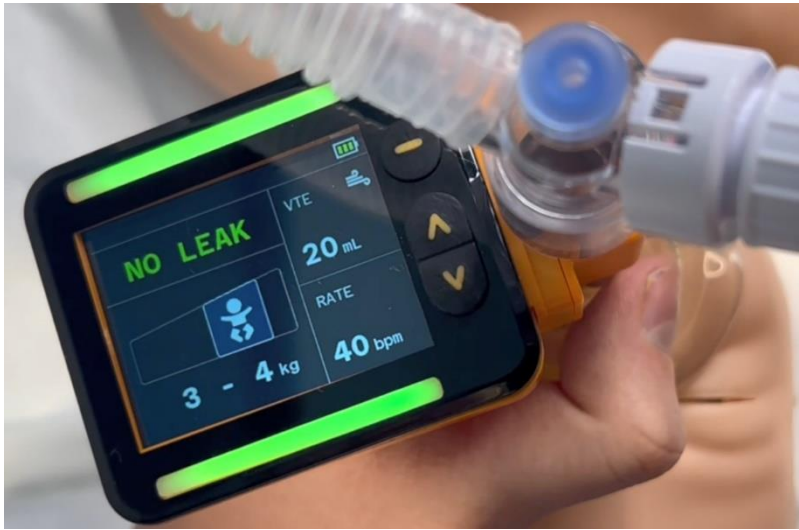

Figure 4S: icon graphic display of features pre-commercial prototype.

### Prototype display used in Study

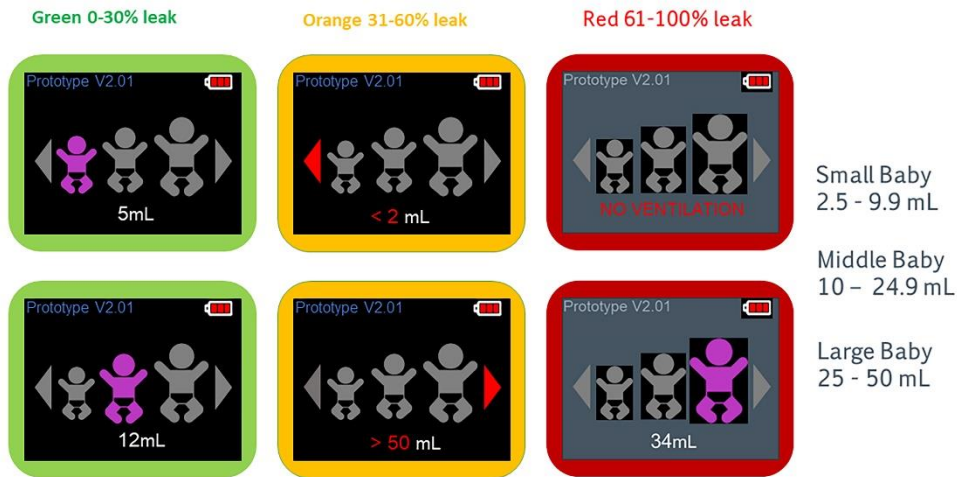

Supplement: Supplementary file [file media-1.pdf]
